# Supplementary material
Source: PubMed Central journal article supplement (PMC3078445)

### 1. Step: Search for genes commonly expressed

SP-a with SP-b  
↓  
SP-ab  
42924 genes

SP-c with SP-d  
↓  
SP-cd  
44542 genes

UCP-a with UCP-b  
↓  
UCP-ab  
49000 genes

non-SP-a with non-SP-b  
↓  
non-SP-ab  
42752 genes

non-SP-c with non-SP-d  
↓  
non-SP-cd  
40749 genes

### 2a. Step: Search for genes differentially expressed

SP-ab vs. UCP-ab  
↓  
2236 up-regulated genes  
4308 down-regulated genes

SP-cd vs. UCP-ab  
↓  
2080 up-regulated genes  
3044 down-regulated genes

non-SP-ab vs. UCP-ab  
↓  
1931 up-regulated genes  
2875 down-regulated genes

non-SP-cd vs. UCP-ab  
↓  
1966 up-regulated genes  
4942 down-regulated genes

### 2b. Step: Search for genes differentially expressed

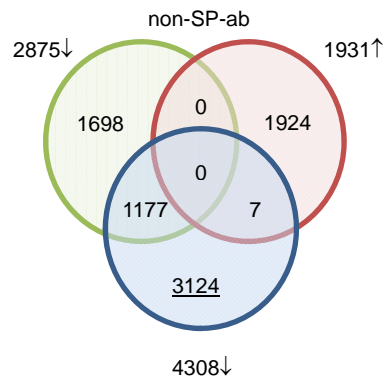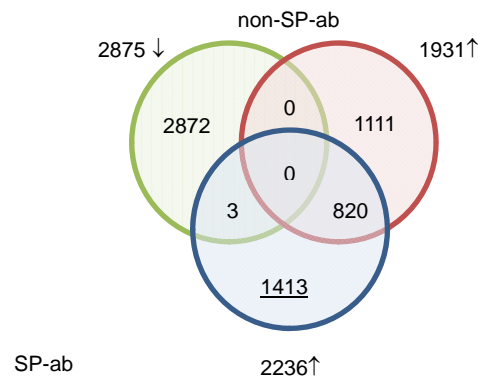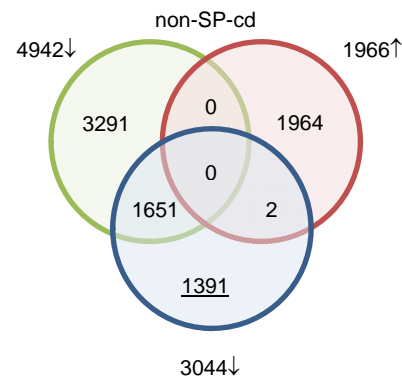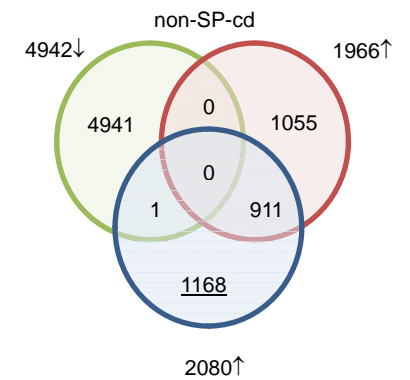

### 3. Step: Search for genes commonly up- or down-regulated in SP-cells

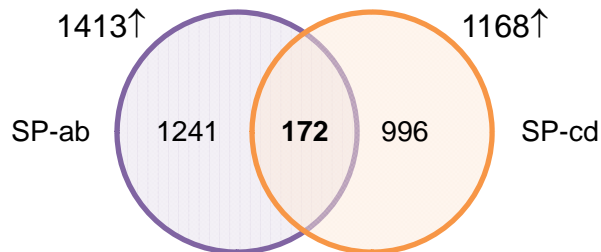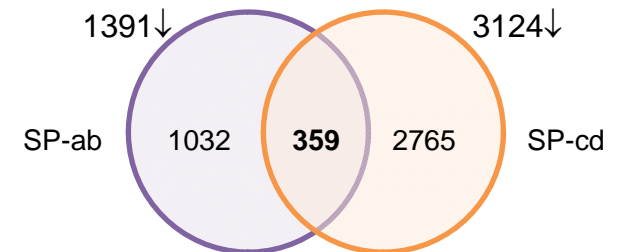

Supplement: mmc2.pdf [file mmc2.pdf]
