# Supplementary material
Source: PubMed Central journal article supplement (PMC3078445)
Supplement: mmc3.pdf [file mmc3.pdf]

**Supplementary Table 1: SP and non-SP cells of two different gastric cancer cell lines show different immunophenotypes.**

|              |               | <b>AGS</b>       |                  |                | <b>MKN45</b>     |                  |                |
|--------------|---------------|------------------|------------------|----------------|------------------|------------------|----------------|
|              |               | <b>Negative</b>  | <b>Positive</b>  | <b>p-value</b> | <b>Negative</b>  | <b>Positive</b>  | <b>p-value</b> |
|              |               | <b>cells [%]</b> | <b>cells [%]</b> |                | <b>cells [%]</b> | <b>cells [%]</b> |                |
| <b>CD44</b>  | <b>SP</b>     | 38               | 62               | 0.007          | 63               | 37               | 0.08           |
|              | <b>non-SP</b> | 51               | 49               |                | 49               | 51               |                |
| <b>CD117</b> | <b>SP</b>     | 85               | 15               | 0.44           | 83               | 17               | 0.42           |
|              | <b>non-SP</b> | 88               | 12               |                | 88               | 12               |                |
| <b>CD133</b> | <b>SP</b>     | 5                | 95               | 0.003          | 0                | 100              | <0.001         |
|              | <b>non-SP</b> | 14               | 86               |                | 30               | 70               |                |
| <b>LGR5</b>  | <b>SP</b>     | 0                | 100              | n.s.           | 0                | 100              | n.s.           |
|              | <b>non-SP</b> | 0                | 100              |                | 0                | 100              |                |
| <b>MSI-1</b> | <b>SP</b>     | 5                | 95               | <0.001         | 4                | 96               | <0.001         |
|              | <b>non-SP</b> | 56               | 44               |                | 43               | 57               |                |
