# Supplementary material
Source: PubMed Central journal article supplement (PMC3078445)
Supplement: mmc4.pdf [file mmc4.pdf]

**Supplementary Table 2:** Genes differentially expressed in the side population of AGS gastric cancer cells.

**Up-regulated genes**

| Probe Set ID | Gene Symbol        | Gene Title                                                                                                                                                                                                                   |
|--------------|--------------------|------------------------------------------------------------------------------------------------------------------------------------------------------------------------------------------------------------------------------|
| 1552790_a_at | SEC62              | SEC62 homolog (S. cerevisiae)                                                                                                                                                                                                |
| 1554014_at   | CHD2<br>KLRC4 ///  | chromodomain helicase DNA binding protein 2                                                                                                                                                                                  |
| 1555691_a_at | KLRK1              | killer cell lectin-like receptor subfamily C, member 4                                                                                                                                                                       |
| 1555842_at   | LOC284356          | hypothetical LOC284356                                                                                                                                                                                                       |
| 1557189_at   | DNASE1             | deoxyribonuclease I                                                                                                                                                                                                          |
| 1557257_at   | BCL10              | B-cell CLL/lymphoma 10                                                                                                                                                                                                       |
| 1557567_a_at | LOC148987          | hypothetical protein LOC148987                                                                                                                                                                                               |
| 1557744_at   | ---                | ---                                                                                                                                                                                                                          |
| 1557964_at   | EIF4G2             | eukaryotic translation initiation factor 4 gamma, 2                                                                                                                                                                          |
| 1558154_at   | ---                | lethal giant larvae homolog 2 (Drosophila)                                                                                                                                                                                   |
| 1560689_s_at | AKT2<br>LOC285103/ | V-akt murine thymoma viral oncogene homolog 2                                                                                                                                                                                |
| 1561433_at   | LOC100133471       | hypothetical protein LOC285103/hypothetical protein LOC100133471                                                                                                                                                             |
| 1561871_at   | ---                | ---                                                                                                                                                                                                                          |
| 1561937_x_at | IGHG1              | Immunoglobulin heavy constant mu                                                                                                                                                                                             |
| 1568600_at   | CALML4             | calmodulin-like 4                                                                                                                                                                                                            |
| 200688_at    | SF3B3              | splicing factor 3b, subunit 3, 130kDa                                                                                                                                                                                        |
| 200921_s_at  | BTG1               | B-cell translocation gene 1, anti-proliferative                                                                                                                                                                              |
| 201018_at    | EIF1AX             | eukaryotic translation initiation factor 1A, X-linked                                                                                                                                                                        |
| 201285_at    | MKRN1              | makorin, ring finger protein, 1                                                                                                                                                                                              |
| 201677_at    | C3orf37            | Chromosome 3 open reading frame 37                                                                                                                                                                                           |
| 201855_s_at  | ATMIN              | ATM interactor                                                                                                                                                                                                               |
| 202353_s_at  | PSMD12             | proteasome (prosome, macropain) 26S subunit, non-ATPase, 12                                                                                                                                                                  |
| 202478_at    | TRIB2              | tribbles homolog 2 (Drosophila)<br>sparc/osteonectin, cwcv and kazal-like domains proteoglycan (testican) 2                                                                                                                  |
| 202524_s_at  | SPOCK2             |                                                                                                                                                                                                                              |
| 202646_s_at  | CSDE1              | cold shock domain containing E1, RNA-binding                                                                                                                                                                                 |
| 202743_at    | PIK3R3             | phosphoinositide-3-kinase, regulatory subunit 3 (gamma)                                                                                                                                                                      |
| 202768_at    | FOSB               | FBJ murine osteosarcoma viral oncogene homolog B                                                                                                                                                                             |
| 203706_s_at  | FZD7               | frizzled homolog 7 (Drosophila)                                                                                                                                                                                              |
| 203725_at    | GADD45A            | growth arrest and DNA-damage-inducible, alpha                                                                                                                                                                                |
| 203818_s_at  | SF3A3              | splicing factor 3a, subunit 3, 60kDa                                                                                                                                                                                         |
| 204254_s_at  | VDR                | vitamin D (1,25- dihydroxyvitamin D3) receptor                                                                                                                                                                               |
| 204287_at    | SYNGR1             | synaptogyrin 1                                                                                                                                                                                                               |
| 204420_at    | FOSL1              | FOS-like antigen 1                                                                                                                                                                                                           |
| 204436_at    | PLEKHO2            | pleckstrin homology domain containing, family O member 2                                                                                                                                                                     |
| 206019_at    | RBM19              | RNA binding motif protein 19<br>fibroblast growth factor receptor 2 (bacteria-expressed kinase, keratinocyte growth factor receptor, craniofacial dysostosis 1, Crouzon syndrome, Pfeiffer syndrome, Jackson-Weiss syndrome) |
| 208229_at    | FGFR2              |                                                                                                                                                                                                                              |
| 208877_at    | PAK2               | p21 (CDKN1A)-activated kinase 2<br>transcription factor 3 (E2A immunoglobulin enhancer binding factors E12/E47)                                                                                                              |
| 209153_s_at  | TCF3               |                                                                                                                                                                                                                              |
| 209255_at    | KIAA0265           | KIAA0265 protein                                                                                                                                                                                                             |
| 209505_at    | NR2F1              | Nuclear receptor subfamily 2, group F, member 1                                                                                                                                                                              |
| 211347_at    | CDC14B             | CDC14 cell division cycle 14 homolog B (S. cerevisiae)                                                                                                                                                                       |
| 212111_at    | STX12              | syntaxin 12                                                                                                                                                                                                                  |
| 212256_at    | GALNT10            | UDP-N-acetyl-alpha-D-galactosamine:polypeptide N-acetylgalactosaminyltransferase 10 (GalNAc-T10)                                                                                                                             |

## Schmuck et al. - Supplementary documents 4

|             |              |                                                                            |
|-------------|--------------|----------------------------------------------------------------------------|
| 212310_at   | MIA3         | melanoma inhibitory activity family, member 3                              |
| 212371_at   | FAM152A      | family with sequence similarity 152, member A                              |
| 212463_at   | CD59         | CD59 molecule, complement regulatory protein                               |
| 212482_at   | RMND5A       | required for meiotic nuclear division 5 homolog A ( <i>S. cerevisiae</i> ) |
| 212549_at   | STAT5B       | signal transducer and activator of transcription 5B                        |
| 212605_s_at | ---          | ---                                                                        |
| 212799_at   | STX6         | syntaxin 6                                                                 |
| 212996_s_at | URB1         | URB1 ribosome biogenesis 1 homolog ( <i>S. cerevisiae</i> )                |
| 213018_at   | GATAD1       | GATA zinc finger domain containing 1                                       |
| 213051_at   | ZC3HAV1      | zinc finger CCCH-type, antiviral 1                                         |
| 213295_at   | CYLD         | cyldromatosis (turban tumor syndrome)                                      |
| 213532_at   | ADAM17       | ADAM metallopeptidase domain 17                                            |
| 213615_at   | MBOAT5       | Membrane bound O-acyltransferase domain containing 5                       |
| 213778_x_at | ZNF276       | zinc finger protein 276                                                    |
| 213982_s_at | RABGAP1L     | RAB GTPase activating protein 1-like                                       |
| 214079_at   | DHRS2        | dehydrogenase/reductase (SDR family) member 2                              |
| 214157_at   | GNAS         | GNAS complex locus                                                         |
| 214868_at   | PIWIL1       | piwi-like 1 ( <i>Drosophila</i> )                                          |
| 214980_at   | UBE3A        | Ubiquitin protein ligase E3A                                               |
| 215809_at   | CYP2D6       | cytochrome P450, family 2, subfamily D, polypeptide 6                      |
| 217783_s_at | YPEL5        | yippee-like 5 ( <i>Drosophila</i> )                                        |
| 217974_at   | TM7SF3       | transmembrane 7 superfamily member 3                                       |
| 218629_at   | SMO          | smoothened homolog ( <i>Drosophila</i> )                                   |
| 218964_at   | ARID3B       | AT rich interactive domain 3B (BRIGHT-like)                                |
| 220180_at   | CCDC68       | coiled-coil domain containing 68                                           |
|             | LOC100132214 |                                                                            |
|             | ///          |                                                                            |
| 220692_at   | LOC100134722 | similar to HSPC047 protein /// similar to HSPC047 protein                  |
| 221260_s_at | FAM130A1     | family with sequence similarity 130, member A1                             |
| 221527_s_at | PARD3        | par-3 partitioning defective 3 homolog ( <i>C. elegans</i> )               |
| 221571_at   | TRAF3        | TNF receptor-associated factor 3                                           |
| 222383_s_at | ALOXE3       | arachidonate lipoxygenase 3                                                |
| 222681_at   | KTELC1       | KTEL (Lys-Tyr-Glu-Leu) containing 1                                        |
| 222829_s_at | IL20RA       | interleukin 20 receptor, alpha                                             |
| 223052_x_at | SSU72        | SSU72 RNA polymerase II CTD phosphatase homolog ( <i>S. cerevisiae</i> )   |
| 223408_s_at | ---          | ---                                                                        |
| 224711_at   | YY1          | YY1 transcription factor                                                   |
| 224893_at   | ATL3         | atlastin 3                                                                 |
| 224945_at   | BTBD7        | BTB (POZ) domain containing 7                                              |
| 224998_at   | CMTM4        | CKLF-like MARVEL transmembrane domain containing 4                         |
| 225002_s_at | SUMF2        | sulfatase modifying factor 2                                               |
| 225045_at   | CCDC88A      | coiled-coil domain containing 88A                                          |
| 225192_at   | C10orf46     | chromosome 10 open reading frame 46                                        |
| 225276_at   | ---          | ---                                                                        |
| 225342_at   | AK3L1        | adenylate kinase 3-like 1                                                  |
| 225488_at   | DERL1        | Der1-like domain family, member 1                                          |
|             | NPHP3 ///    | nephronophthisis 3 (adolescent) /// acyl-Coenzyme A dehydrogenase          |
| 225573_at   | ACAD11       | family, member 11                                                          |
| 225725_at   | ---          | ---                                                                        |
| 225813_at   | RC3H2        | ring finger and CCCH-type zinc finger domains 2                            |
| 225876_at   | NPAL3        | NIPA-like domain containing 3                                              |
| 225962_at   | ZNRF1        | zinc and ring finger 1                                                     |
| 226137_at   | ZFHX3        | zinc finger homeobox 3                                                     |
| 226326_at   | PCGF5        | polycomb group ring finger 5                                               |
| 226327_at   | ZNF507       | zinc finger protein 507                                                    |
| 226377_at   | ---          | ---                                                                        |

## Schmuck et al. - Supplementary documents 5

|             |                  |                                                                                                                         |
|-------------|------------------|-------------------------------------------------------------------------------------------------------------------------|
| 226391_at   | ---              | ---                                                                                                                     |
| 226394_at   | MARCH5           | membrane-associated ring finger (C3HC4) 5                                                                               |
| 226533_at   | HINT3            | histidine triad nucleotide binding protein 3                                                                            |
| 226567_at   | USP14            | ubiquitin specific peptidase 14 (tRNA-guanine transglycosylase)                                                         |
| 226572_at   | SOCS7            | suppressor of cytokine signaling 7                                                                                      |
| 226692_at   | SERF2            | small EDRK-rich factor 2                                                                                                |
| 226719_at   | ---              | ---                                                                                                                     |
| 226760_at   | LOC203411        | hypothetical protein LOC203411<br>v-abl Abelson murine leukemia viral oncogene homolog 2 (arg,<br>Abelson-related gene) |
| 226893_at   | ABL2             |                                                                                                                         |
| 227020_at   | YPEL2            | yippee-like 2 (Drosophila)                                                                                              |
| 227060_at   | RELT             | RELT tumor necrosis factor receptor                                                                                     |
| 227150_at   | MTF1             | metal-regulatory transcription factor 1                                                                                 |
| 227193_at   | ---              | ---                                                                                                                     |
| 227306_at   | ---              | ---                                                                                                                     |
| 227329_at   | ZBTB46           | zinc finger and BTB domain containing 46                                                                                |
| 227467_at   | RDH10            | retinol dehydrogenase 10 (all-trans)                                                                                    |
| 227504_s_at | ---              | ---                                                                                                                     |
| 227576_at   | ---              | ---                                                                                                                     |
| 227586_at   | TMEM170          | transmembrane protein 170                                                                                               |
| 227604_at   | LOC151146        | hypothetical protein LOC151146                                                                                          |
| 227770_at   | ---              | ---                                                                                                                     |
|             | NBPF14 ///       |                                                                                                                         |
|             | NBPF1 ///        |                                                                                                                         |
|             | KIAA1245 ///     |                                                                                                                         |
|             | NBPF11 ///       |                                                                                                                         |
|             | NBPF15 ///       |                                                                                                                         |
|             | NBPF20 ///       |                                                                                                                         |
|             | NBPF9 ///        | neuroblastoma breakpoint family, member 14 ///                                                                          |
|             | NBPF10 ///       | neuroblastoma breakpoint family, member 1 ///                                                                           |
|             | NBPF8 ///        | KIAA1245 ///                                                                                                            |
|             | RP3-377D14.1 /// | neuroblastoma breakpoint family, member 11 ///                                                                          |
|             | XXyac-           | neuroblastoma breakpoint family, member 15 ///                                                                          |
|             | YX155B6.1 ///    | neuroblastoma breakpoint family, member 20 ///                                                                          |
|             | NBPF16 ///       | neuroblastoma breakpoint family, member 9 ///                                                                           |
|             |                  | neuroblastoma breakpoint family, member 10 ///                                                                          |
|             |                  | neuroblastoma breakpoint family, member 8 ///                                                                           |
|             |                  | CG10522-PA-like ///                                                                                                     |
|             |                  | CLIP-190-like ///                                                                                                       |
|             |                  | neuroblastoma breakpoint family, member 16 ///                                                                          |
| 227926_s_at | LOC100132406     | similar to NBPF9                                                                                                        |
| 228000_at   | ADC              | arginine decarboxylase                                                                                                  |
| 228031_at   | C20orf121        | chromosome 20 open reading frame 121                                                                                    |
| 228153_at   | RNF144B          | ring finger 144B                                                                                                        |
| 228176_at   | S1PR3            | sphingosine-1-phosphate receptor 3                                                                                      |
| 228214_at   | ---              | ---                                                                                                                     |
| 228226_s_at | ZNF775           | zinc finger protein 775                                                                                                 |
| 228349_at   | ---              | ---                                                                                                                     |
|             |                  | nuclear factor of kappa light polypeptide gene enhancer in B-cells inhibitor, beta                                      |
| 228388_at   | NFKBIB           |                                                                                                                         |
| 228539_at   | ---              | ---                                                                                                                     |
| 228797_at   | ---              | ---                                                                                                                     |
| 228964_at   | PRDM1            | PR domain containing 1, with ZNF domain                                                                                 |
| 229126_at   | TMEM19           | transmembrane protein 19                                                                                                |
| 229279_at   | ---              | ---                                                                                                                     |
| 229544_at   | ---              | ---                                                                                                                     |
| 229572_at   | ---              | ---                                                                                                                     |
| 229813_x_at | DAZAP1           | DAZ associated protein 1                                                                                                |
| 229901_at   | ZNF488           | zinc finger protein 488                                                                                                 |
| 230110_at   | MCOLN2           | mucolipin 2                                                                                                             |
| 230302_at   | ---              | ---                                                                                                                     |
| 230369_at   | GPR161           | G protein-coupled receptor 161                                                                                          |

## Schmuck et al. - Supplementary documents 6

|             |           |                                                                         |
|-------------|-----------|-------------------------------------------------------------------------|
| 230491_at   | ---       | ---                                                                     |
| 230570_at   | ---       | ---                                                                     |
| 230758_at   | GEMIN8    | gem (nuclear organelle) associated protein 8                            |
| 231686_at   | GATM      | Glycine amidinotransferase (L-arginine:glycine amidinotransferase)      |
| 231984_at   | MTAP      | methylthioadenosine phosphorylase                                       |
| 232391_at   | ZNF461    | zinc finger protein 461                                                 |
| 232649_at   | GLDN      | gliomedin                                                               |
| 233254_x_at | PTEN      | phosphatase and tensin homolog (mutated in multiple advanced cancers 1) |
| 234590_x_at | ---       | ---                                                                     |
| 235045_at   | RBM7      | RNA binding motif protein 7                                             |
| 235695_at   | ---       | ---                                                                     |
| 235830_at   | ---       | ---                                                                     |
| 236104_at   | ---       | ---                                                                     |
| 236605_at   | EIF3K     | eukaryotic translation initiation factor 3, subunit K                   |
| 236821_at   | ---       | ---                                                                     |
| 236975_at   | ---       | ---                                                                     |
| 237321_at   | ---       | ---                                                                     |
| 237594_at   | ---       | ---                                                                     |
| 238295_at   | C17orf42  | Chromosome 17 open reading frame 42                                     |
| 238813_at   | ---       | ---                                                                     |
| 239430_at   | IGFL1     | IGF-like family member 1                                                |
| 240440_at   | NPL       | N-acetylneuraminate pyruvate lyase (dihydrodipicolinate synthase)       |
| 241430_at   | C2orf51   | chromosome 2 open reading frame 51                                      |
| 241948_at   | ---       | ---                                                                     |
| 242181_at   | ---       | ---                                                                     |
| 242329_at   | LOC401317 | hypothetical LOC401317                                                  |
| 242398_x_at | ---       | ---                                                                     |
| 242751_at   | ---       | ---                                                                     |
| 242875_at   | ---       | ---                                                                     |
| 243078_at   | ---       | ---                                                                     |
| 243509_at   | ---       | ---                                                                     |
| 38037_at    | HBEGF     | heparin-binding EGF-like growth factor                                  |
| 44783_s_at  | HEY1      | hairly/enhancer-of-split related with YRPW motif 1                      |
| 58916_at    | KCTD14    | potassium channel tetramerisation domain containing 14                  |

### Down-regulated genes

| Probe Set ID | Gene Symbol | Gene Title                                                   |
|--------------|-------------|--------------------------------------------------------------|
| 1552510_at   | SLC34A3     | solute carrier family 34 (sodium phosphate), member 3        |
| 1552528_at   | C21orf67    | chromosome 21 open reading frame 67                          |
| 1552579_a_at | ADAM21      | ADAM metalloproteinase domain 21                             |
| 1552997_a_at | IQCF1       | IQ motif containing F1                                       |
| 1553262_a_at | UTS2R       | urotensin 2 receptor                                         |
| 1553354_a_at | FLJ31958    | hypothetical protein FLJ31958                                |
| 1553770_a_at | SLAMF9      | SLAM family member 9                                         |
| 1553959_a_at | B3GALT6     | UDP-Gal:betaGal beta 1,3-galactosyltransferase polypeptide 6 |
| 1554023_s_at | CCDC13      | coiled-coil domain containing 13                             |
| 1554115_at   | LOC133874   | hypothetical gene LOC133874                                  |
| 1554318_at   | LOC541473   | FK506 binding protein 6, 36kDa pseudogene                    |
| 1554341_a_at | HEL308      | DNA helicase HEL308                                          |
| 1554428_s_at | NLGN2       | neuroligin 2                                                 |
| 1554712_a_at | GLYATL2     | glycine-N-acyltransferase-like 2                             |
| 1554986_a_at | SNX19       | sorting nexin 19                                             |

Schmuck et al. - Supplementary documents 7

|              |               |                                                                                                   |
|--------------|---------------|---------------------------------------------------------------------------------------------------|
| 1555131_a_at | PER3          | period homolog 3 (Drosophila)                                                                     |
| 1555325_s_at | ZNF26         | zinc finger protein 26                                                                            |
| 1555373_at   | C21orf114     | chromosome 21 open reading frame 114                                                              |
| 1555751_a_at | GEMIN7        | gem (nuclear organelle) associated protein 7                                                      |
| 1556042_s_at | LOC338799     | hypothetical locus LOC338799                                                                      |
| 1556422_at   | ---           | ---                                                                                               |
| 1556771_a_at | LOC415056     | hypothetical gene LOC415056                                                                       |
| 1557523_at   | LOC92270      | hypothetical protein LOC92270                                                                     |
| 1557818_x_at | LOC100131941  | Hypothetical protein LOC100131941                                                                 |
| 1557965_at   | MTERFD2       | MTERF domain containing 2                                                                         |
| 1558202_at   | LOC145783     | hypothetical LOC145783                                                                            |
| 1558882_at   | LOC401233     | similar to HIV TAT specific factor 1; cofactor required for Tat activation of HIV-1 transcription |
| 1559307_s_at | RBL1          | retinoblastoma-like 1 (p107)                                                                      |
| 1559315_s_at | LOC144481     | hypothetical protein LOC144481                                                                    |
| 1560078_at   | LAMA3         | laminin, alpha 3                                                                                  |
| 1560279_a_at | LOC221122     | hypothetical protein LOC221122                                                                    |
| 1560430_at   | NKPD1         | NTPase, KAP family P-loop domain containing 1                                                     |
| 1560742_at   | ---           | ---                                                                                               |
| 1561056_a_at | ---           | ---                                                                                               |
| 1561403_at   | SOHLH1        | spermatogenesis and oogenesis specific basic helix-loop-helix 1                                   |
| 1562862_at   | ---           | ---                                                                                               |
| 1565337_at   | DNAH6         | dynein, axonemal, heavy chain 6                                                                   |
| 1566484_at   | ---           | ---                                                                                               |
| 1566923_at   | ---           | ---                                                                                               |
| 1567107_s_at | TPM4          | tropomyosin 4                                                                                     |
| 1567458_s_at | RAC1          | ras-related C3 botulinum toxin substrate 1 (rho family, small GTP binding protein Rac1)           |
| 1569532_a_at | RP11-216L13.5 | MSFL2541                                                                                          |
| 1569973_at   | ---           | ---                                                                                               |
| 1570089_at   | ---           | ---                                                                                               |
| 1861_at      | BAD           | BCL2-antagonist of cell death                                                                     |
| 200072_s_at  | HNRNPM        | heterogeneous nuclear ribonucleoprotein M                                                         |
| 200611_s_at  | WDR1          | WD repeat domain 1                                                                                |
| 200613_at    | AP2M1         | adaptor-related protein complex 2, mu 1 subunit                                                   |
| 200828_s_at  | ZNF207        | zinc finger protein 207                                                                           |
| 200841_s_at  | EPRS          | glutamyl-prolyl-tRNA synthetase                                                                   |
| 200846_s_at  | PPP1CA        | protein phosphatase 1, catalytic subunit, alpha isoform                                           |
| 200916_at    | TAGLN2        | transgelin 2                                                                                      |
| 200922_at    | KDELR1        | KDEL (Lys-Asp-Glu-Leu) endoplasmic reticulum protein retention receptor 1                         |
| 200959_at    | FUS           | fusion (involved in t(12;16) in malignant liposarcoma)                                            |
| 201073_s_at  | SMARCC1       | SWI/SNF related, matrix associated, actin dependent regulator of chromatin, subfamily c, member 1 |
| 201208_s_at  | TNFAIP1       | tumor necrosis factor, alpha-induced protein 1 (endothelial)                                      |
| 201283_s_at  | TRAK1         | trafficking protein, kinesin binding 1                                                            |
| 201294_s_at  | WSB1          | WD repeat and SOCS box-containing 1                                                               |
| 201321_s_at  | SMARCC2       | SWI/SNF related, matrix associated, actin dependent regulator of chromatin, subfamily c, member 2 |
| 201392_s_at  | IGF2R         | insulin-like growth factor 2 receptor                                                             |
| 201430_s_at  | DPYSL3        | dihydropyrimidinase-like 3                                                                        |
| 201563_at    | SORD          | sorbitol dehydrogenase                                                                            |
| 201650_at    | KRT19         | keratin 19                                                                                        |
| 201714_at    | TUBG1         | tubulin, gamma 1                                                                                  |
| 201847_at    | LIPA          | lipase A, lysosomal acid, cholesterol esterase (Wolman disease)                                   |
| 201868_s_at  | TBL1X         | transducin (beta)-like 1X-linked                                                                  |
| 202065_s_at  | PPFIA1        | protein tyrosine phosphatase, receptor type, f polypeptide (PTPRF),                               |

Schmuck et al. - Supplementary documents 8

|             |               |                                                                                                           |
|-------------|---------------|-----------------------------------------------------------------------------------------------------------|
|             |               | interacting protein (liprin), alpha 1                                                                     |
| 202147_s_at | IFRD1         | interferon-related developmental regulator 1                                                              |
| 202290_at   | PDAP1         | PDGFA associated protein 1                                                                                |
| 202339_at   | SYMPK         | symplekin                                                                                                 |
|             | HSF1 ///      | heat shock transcription factor 1 ///                                                                     |
| 202344_at   | LOC642255     | similar to Diacylglycerol O-acyltransferase 1 (Diglyceride acyltransferase) (ACAT-related gene product 1) |
| 202375_at   | SEC24D        | SEC24 related gene family, member D (S. cerevisiae)                                                       |
|             | RANBP1 ///    |                                                                                                           |
| 202482_x_at | LOC389842     | RAN binding protein 1 ///                                                                                 |
| 202706_s_at | UMPS          | uridine monophosphate synthetase                                                                          |
|             |               | solute carrier family 16, member 3 (monocarboxylic acid transporter 4)                                    |
| 202855_s_at | SLC16A3       | PRP19/PSO4 pre-mRNA processing factor 19 homolog (S. cerevisiae)                                          |
| 203103_s_at | PRPF19        |                                                                                                           |
| 203105_s_at | DNM1L         | dynamamin 1-like                                                                                          |
| 203272_s_at | TUSC2         | tumor suppressor candidate 2                                                                              |
| 203373_at   | SOCS2         | suppressor of cytokine signaling 2                                                                        |
| 203736_s_at | PPFIBP1       | PTPRF interacting protein, binding protein 1 (liprin beta 1)                                              |
| 203840_at   | BLZF1         | basic leucine zipper nuclear factor 1 (JEM-1)                                                             |
| 203931_s_at | MRPL12        | mitochondrial ribosomal protein L12                                                                       |
| 204080_at   | TOE1          | target of EGR1, member 1 (nuclear)                                                                        |
| 204092_s_at | AURKA         | aurora kinase A                                                                                           |
| 204383_at   | DGCR14        | DiGeorge syndrome critical region gene 14                                                                 |
| 204488_at   | DOLK          | dolichol kinase                                                                                           |
| 204601_at   | N4BP1         | NEDD4 binding protein 1                                                                                   |
| 204610_s_at | CCDC85B       | coiled-coil domain containing 85B                                                                         |
| 204615_x_at | IDI1          | isopentenyl-diphosphate delta isomerase 1                                                                 |
| 204666_s_at | RP5-1000E10.4 | suppressor of IKK epsilon                                                                                 |
| 204841_s_at | EEA1          | early endosome antigen 1                                                                                  |
| 204978_at   | SFRS16        | splicing factor, arginine/serine-rich 16                                                                  |
| 205018_s_at | MBNL2         | muscleblind-like 2 (Drosophila)                                                                           |
| 205107_s_at | EFNA4         | ephrin-A4                                                                                                 |
| 205135_s_at | NUFIP1        | nuclear fragile X mental retardation protein interacting protein 1                                        |
| 205291_at   | IL2RB         | interleukin 2 receptor, beta                                                                              |
| 205341_at   | EHD2          | EH-domain containing 2                                                                                    |
| 205365_at   | HOXB6         | homeobox B6                                                                                               |
| 205369_x_at | DBT           | dihydrolipoamide branched chain transacylase E2                                                           |
| 206327_s_at | CDH15         | cadherin 15, M-cadherin (myotubule)                                                                       |
| 206689_x_at | HTATIP        | HIV-1 Tat interacting protein, 60kDa                                                                      |
| 206763_at   | FKBP6         | FK506 binding protein 6, 36kDa                                                                            |
| 206971_at   | GPR161        | G protein-coupled receptor 161                                                                            |
| 206997_s_at | HS6ST1        | heparan sulfate 6-O-sulfotransferase 1                                                                    |
| 207125_at   | ZNF225        | zinc finger protein 225                                                                                   |
| 207449_s_at | POFUT2        | protein O-fucosyltransferase 2                                                                            |
| 207473_at   | MLN           | motilin                                                                                                   |
| 207604_s_at | SLC4A7        | solute carrier family 4, sodium bicarbonate cotransporter, member 7                                       |
| 207769_s_at | PQBP1         | polyglutamine binding protein 1                                                                           |
| 207922_s_at | MAEA          | macrophage erythroblast attacher                                                                          |
| 207936_x_at | RFPL3         | ret finger protein-like 3                                                                                 |
| 207971_s_at | CEP68         | centrosomal protein 68kDa                                                                                 |
| 208188_at   | KRT9          | keratin 9 (epidermolytic palmoplantar keratoderma)                                                        |
| 208325_s_at | AKAP13        | A kinase (PRKA) anchor protein 13                                                                         |
| 208360_s_at | ---           | ---                                                                                                       |
| 208595_s_at | MBD1          | methyl-CpG binding domain protein 1                                                                       |
| 208624_s_at | EIF4G1        | eukaryotic translation initiation factor 4 gamma, 1                                                       |

## Schmuck et al. - Supplementary documents 9

|             |                        |                                                                                                                           |
|-------------|------------------------|---------------------------------------------------------------------------------------------------------------------------|
| 208647_at   | FDFT1                  | farnesyl-diphosphate farnesyltransferase 1                                                                                |
| 208937_s_at | ID1                    | inhibitor of DNA binding 1, dominant negative helix-loop-helix protein                                                    |
| 209000_s_at |                        | Sep 08 septin 8                                                                                                           |
| 209091_s_at | SH3GLB1                | SH3-domain GRB2-like endophilin B1                                                                                        |
| 209129_at   | TRIP6                  | thyroid hormone receptor interactor 6                                                                                     |
| 209132_s_at | COMMD4                 | COMM domain containing 4                                                                                                  |
| 209212_s_at | KLF5                   | Kruppel-like factor 5 (intestinal)                                                                                        |
| 209214_s_at | EWSR1                  | Ewing sarcoma breakpoint region 1                                                                                         |
| 209241_x_at | MINK1                  | misshapen-like kinase 1 (zebrafish)                                                                                       |
| 209254_at   | KIAA0265               | KIAA0265 protein                                                                                                          |
| 209408_at   | KIF2C                  | kinesin family member 2C                                                                                                  |
| 209608_s_at | ACAT2                  | acetyl-Coenzyme A acetyltransferase 2                                                                                     |
| 209753_s_at | TMPO                   | thymopoietin                                                                                                              |
| 209833_at   | CRADD                  | CASP2 and RIPK1 domain containing adaptor with death domain                                                               |
| 209899_s_at | PUF60                  | poly-U binding splicing factor 60KDa<br>bone morphogenetic protein receptor, type II (serine/threonine kinase)            |
| 209920_at   | BMPR2                  |                                                                                                                           |
| 209922_at   | BRAP                   | BRCA1 associated protein                                                                                                  |
| 209925_at   | OCN                    | occludin                                                                                                                  |
| 210041_s_at | PGM3                   | phosphoglucomutase 3                                                                                                      |
| 210101_x_at | SH3GLB1                | SH3-domain GRB2-like endophilin B1                                                                                        |
| 210145_at   | PLA2G4A                | phospholipase A2, group IVA (cytosolic, calcium-dependent)                                                                |
| 210405_x_at | TNFRSF10B              | tumor necrosis factor receptor superfamily, member 10b                                                                    |
| 210416_s_at | CHEK2                  | CHK2 checkpoint homolog (S. pombe)                                                                                        |
| 210436_at   | CCT8                   | chaperonin containing TCP1, subunit 8 (theta)                                                                             |
| 210850_s_at | ELK1                   | ELK1, member of ETS oncogene family                                                                                       |
| 210894_s_at | CEP250                 | centrosomal protein 250kDa                                                                                                |
| 210950_s_at | FDFT1                  | farnesyl-diphosphate farnesyltransferase 1                                                                                |
| 211258_s_at | TGFA                   | transforming growth factor, alpha                                                                                         |
| 211317_s_at | CFLAR                  | CASP8 and FADD-like apoptosis regulator                                                                                   |
| 211352_s_at | NCOA3                  | nuclear receptor coactivator 3                                                                                            |
| 211387_x_at | RNGTT                  | RNA guanylyltransferase and 5'-phosphatase<br>platelet-activating factor acetylhydrolase, isoform 1b, alpha subunit 45kDa |
| 211547_s_at | PAFAH1B1               |                                                                                                                           |
| 211549_s_at | HPGD                   | hydroxyprostaglandin dehydrogenase 15-(NAD)                                                                               |
| 211576_s_at | SLC19A1                | solute carrier family 19 (folate transporter), member 1                                                                   |
| 211652_s_at | LBP                    | lipopolysaccharide binding protein                                                                                        |
| 211658_at   | PRDX2                  | peroxiredoxin 2                                                                                                           |
| 211762_s_at | KPNA2 ///<br>LOC728860 | karyopherin alpha 2 (RAG cohort 1, importin alpha 1) /// karyopherin alpha-2 subunit like                                 |
| 211778_s_at | OVOL2                  | ovo-like 2 (Drosophila)                                                                                                   |
| 211797_s_at | NFYC                   | nuclear transcription factor Y, gamma<br>Rtf1, Paf1/RNA polymerase II complex component, homolog (S. cerevisiae)          |
| 212302_at   | RTF1                   |                                                                                                                           |
| 212398_at   | RDX                    | radixin                                                                                                                   |
| 212746_s_at | CEP170                 | centrosomal protein 170kDa                                                                                                |
| 212767_at   | MTG1                   | mitochondrial GTPase 1 homolog (S. cerevisiae)                                                                            |
| 212866_at   | R3HCC1                 | R3H domain and coiled-coil containing 1<br>growth arrest and DNA-damage-inducible, gamma interacting protein 1            |
| 212891_s_at | GADD45GIP1             |                                                                                                                           |
| 212910_at   | THAP11                 | THAP domain containing 11                                                                                                 |
| 213023_at   | UTRN                   | utrophin                                                                                                                  |
| 213132_s_at | MCAT                   | malonyl CoA:ACP acyltransferase (mitochondrial)                                                                           |
| 213237_at   | LOC400506              | similar to TSG118.1                                                                                                       |
| 213298_at   | NFIC                   | nuclear factor I/C (CCAAT-binding transcription factor)                                                                   |
| 213446_s_at | IQGAP1                 | IQ motif containing GTPase activating protein 1                                                                           |
| 213472_at   | HNRNPH1                | heterogeneous nuclear ribonucleoprotein H1 (H)                                                                            |

Schmuck et al. - Supplementary documents 10

|             |               |                                                                                                                 |
|-------------|---------------|-----------------------------------------------------------------------------------------------------------------|
| 213607_x_at | NADK          | NAD kinase                                                                                                      |
| 213619_at   | HNRNPH1       | Heterogeneous nuclear ribonucleoprotein H1 (H)                                                                  |
| 213689_x_at | FAM69A        | family with sequence similarity 69, member A                                                                    |
| 213787_s_at | EBP           | emopamil binding protein (sterol isomerase)                                                                     |
| 213794_s_at | NGDN          | neuroguidin, EIF4E binding protein                                                                              |
| 213887_s_at | POLR2E        | polymerase (RNA) II (DNA directed) polypeptide E, 25kDa                                                         |
| 214104_at   | GPR161        | G protein-coupled receptor 161                                                                                  |
| 214119_s_at | FKBP1A        | FK506 binding protein 1A, 12kDa                                                                                 |
| 214338_at   | DNAJB12       | DnaJ (Hsp40) homolog, subfamily B, member 12                                                                    |
| 214525_x_at | MLH3          | mutL homolog 3 (E. coli)                                                                                        |
| 214849_at   | KCTD20        | potassium channel tetramerisation domain containing 20                                                          |
| 214860_at   | SLC9A7        | solute carrier family 9 (sodium/hydrogen exchanger), member 7                                                   |
| 215165_x_at | UMPS          | uridine monophosphate synthetase                                                                                |
| 215198_s_at | CALD1         | caldesmon 1                                                                                                     |
| 215292_s_at | MKL1          | megakaryoblastic leukemia (translocation) 1                                                                     |
| 215424_s_at | SNW1          | SNW domain containing 1                                                                                         |
| 215519_x_at | SGSM3         | small G protein signaling modulator 3                                                                           |
| 215781_s_at | TOP3B         | topoisomerase (DNA) III beta                                                                                    |
| 215978_x_at | LOC152719     | hypothetical protein LOC152719                                                                                  |
| 216023_at   | JMJD2B        | jumonji domain containing 2B                                                                                    |
| 216031_x_at | HN1L          | hematological and neurological expressed 1-like                                                                 |
| 216037_x_at | TCF7L2        | transcription factor 7-like 2 (T-cell specific, HMG-box)                                                        |
| 216044_x_at | FAM69A        | family with sequence similarity 69, member A                                                                    |
| 216088_s_at | PSMA7         | proteasome (prosome, macropain) subunit, alpha type, 7                                                          |
|             | LOC399804 /// | similar to nucleophosmin (nucleolar phosphoprotein B23, numatrin) ///                                           |
| 216387_x_at | LOC100130233  | similar to NPM1 protein<br>solute carrier family 7 (cationic amino acid transporter, y+ system), member 8       |
| 216604_s_at | SLC7A8        | member 8                                                                                                        |
| 216640_s_at | PDIA6         | protein disulfide isomerase family A, member 6                                                                  |
| 217487_x_at | FOLH1         | folate hydrolase (prostate-specific membrane antigen) 1                                                         |
| 217547_x_at | ZNF675        | zinc finger protein 675                                                                                         |
| 217620_s_at | PIK3CB        | phosphoinositide-3-kinase, catalytic, beta polypeptide                                                          |
| 217644_s_at | SOS2          | son of sevenless homolog 2 (Drosophila)                                                                         |
| 217662_x_at | ---           | ---                                                                                                             |
| 217785_s_at | YKT6          | YKT6 v-SNARE homolog (S. cerevisiae)                                                                            |
| 217793_at   | RAB11B        | RAB11B, member RAS oncogene family                                                                              |
| 217794_at   | PRR13         | proline rich 13                                                                                                 |
| 217831_s_at | NSFL1C        | NSFL1 (p97) cofactor (p47)                                                                                      |
| 217868_s_at | METTL9        | methyltransferase like 9                                                                                        |
| 217899_at   | FLJ20254      | hypothetical protein FLJ20254<br>elongation of very long chain fatty acids (FEN1/Elo2, SUR4/Elo3, yeast)-like 1 |
| 218028_at   | ELOVL1        | yeast)-like 1                                                                                                   |
| 218104_at   | TEX10         | testis expressed 10                                                                                             |
| 218190_s_at | UCRC          | ubiquinol-cytochrome c reductase complex (7.2 kD)                                                               |
| 218231_at   | NAGK          | N-acetylglucosamine kinase                                                                                      |
| 218300_at   | C16orf53      | chromosome 16 open reading frame 53                                                                             |
| 218381_s_at | U2AF2         | U2 small nuclear RNA auxiliary factor 2                                                                         |
| 218399_s_at | CDCA4         | cell division cycle associated 4                                                                                |
| 218405_at   | ABT1          | activator of basal transcription 1                                                                              |
| 218415_at   | VPS33B        | vacuolar protein sorting 33 homolog B (yeast)                                                                   |
| 218442_at   | TTC4          | tetratricopeptide repeat domain 4                                                                               |
| 218567_x_at | BBS1 /// DPP3 | Bardet-Biedl syndrome 1 /// dipeptidyl-peptidase 3                                                              |
| 218602_s_at | FAM29A        | family with sequence similarity 29, member A                                                                    |
| 218697_at   | NCKIPSD       | NCK interacting protein with SH3 domain                                                                         |
| 218726_at   | HJURP         | Holliday junction recognition protein                                                                           |
| 218732_at   | PTRH2         | peptidyl-tRNA hydrolase 2                                                                                       |



## Schmuck et al. - Supplementary documents 11

|             |                   |                                                                                                                                                  |
|-------------|-------------------|--------------------------------------------------------------------------------------------------------------------------------------------------|
| 218767_at   | REXO4             | REX4, RNA exonuclease 4 homolog ( <i>S. cerevisiae</i> )                                                                                         |
| 218895_at   | GPATCH3           | G patch domain containing 3                                                                                                                      |
| 218910_at   | TMEM16K           | transmembrane protein 16K                                                                                                                        |
| 218941_at   | FBXW2             | F-box and WD repeat domain containing 2                                                                                                          |
| 219023_at   | C4orf16           | chromosome 4 open reading frame 16                                                                                                               |
| 219123_at   | ZNF232            | zinc finger protein 232                                                                                                                          |
| 219146_at   | C17orf42          | chromosome 17 open reading frame 42                                                                                                              |
| 219184_x_at | TIMM22            | translocase of inner mitochondrial membrane 22 homolog (yeast)                                                                                   |
| 219187_at   | FKBPL             | FK506 binding protein like                                                                                                                       |
| 219219_at   | TMEM160           | transmembrane protein 160                                                                                                                        |
| 219311_at   | CEP76             | centrosomal protein 76kDa                                                                                                                        |
| 219327_s_at | GPRC5C            | G protein-coupled receptor, family C, group 5, member C                                                                                          |
| 219332_at   | MICALL2           | MICAL-like 2                                                                                                                                     |
| 219474_at   | C3orf52           | chromosome 3 open reading frame 52                                                                                                               |
| 219499_at   | SEC61A2           | Sec61 alpha 2 subunit ( <i>S. cerevisiae</i> )                                                                                                   |
| 219502_at   | NEIL3             | nei endonuclease VIII-like 3 ( <i>E. coli</i> )                                                                                                  |
| 219512_at   | DSN1              | DSN1, MIND kinetochore complex component, homolog ( <i>S. cerevisiae</i> )                                                                       |
| 219544_at   | C13orf34          | chromosome 13 open reading frame 34                                                                                                              |
| 219646_at   | DEF8              | differentially expressed in FDCP 8 homolog (mouse)<br>excision repair cross-complementing rodent repair deficiency, complementation group 6-like |
| 219650_at   | ERCC6L            | ERCC6-like 6                                                                                                                                     |
| 219816_s_at | RBM23             | RNA binding motif protein 23                                                                                                                     |
| 219859_at   | CLEC4E            | C-type lectin domain family 4, member E                                                                                                          |
| 219969_at   | CXorf15           | chromosome X open reading frame 15                                                                                                               |
| 220332_at   | CLDN16            | claudin 16                                                                                                                                       |
| 220427_at   | OBSCN             | obscurin, cytoskeletal calmodulin and titin-interacting RhoGEF                                                                                   |
| 220658_s_at | ARNTL2            | aryl hydrocarbon receptor nuclear translocator-like 2                                                                                            |
| 221135_s_at | ASTE1             | asteroid homolog 1 ( <i>Drosophila</i> )                                                                                                         |
| 221503_s_at | KPNA3             | karyopherin alpha 3 (importin alpha 4)                                                                                                           |
|             | GTF2H2 ///        | general transcription factor IIH, polypeptide 2, 44kDa /// general                                                                               |
|             | DKFZP686M0199     | transcription factor IIH, polypeptide 2, 44kDa-like /// general                                                                                  |
|             | /// LOC728340 /// | transcription factor IIH, polypeptide 2, 44kDa-like /// general                                                                                  |
| 221540_x_at | LOC730394         | transcription factor IIH, polypeptide 2, 44kDa-like                                                                                              |
|             | MAGT1 ///         |                                                                                                                                                  |
| 221553_at   | LOC728866         | magnesium transporter 1 /// hypothetical LOC728866                                                                                               |
| 221566_s_at | NOL3              | nucleolar protein 3 (apoptosis repressor with CARD domain)                                                                                       |
| 221580_s_at | JOSD3             | Josephin domain containing 3                                                                                                                     |
| 221649_s_at | PPAN              | peter pan homolog ( <i>Drosophila</i> )                                                                                                          |
| 221685_s_at | CCDC99            | coiled-coil domain containing 99                                                                                                                 |
| 221688_s_at | IMP3              | IMP3, U3 small nucleolar ribonucleoprotein, homolog (yeast)                                                                                      |
| 221723_s_at | SLC4A5            | solute carrier family 4, sodium bicarbonate cotransporter, member 5                                                                              |
| 221734_at   | PRRC1             | proline-rich coiled-coil 1                                                                                                                       |
| 221758_at   | ARMC6             | armadillo repeat containing 6                                                                                                                    |
| 221777_at   | C12orf52          | chromosome 12 open reading frame 52                                                                                                              |
| 221817_at   | DOLPP1            | dolichyl pyrophosphate phosphatase 1                                                                                                             |
| 221822_at   | CCDC101           | coiled-coil domain containing 101                                                                                                                |
| 221836_s_at | NIBP              | trafficking protein particle complex 9                                                                                                           |
| 222130_s_at | FTSJ2             | FtsJ homolog 2 ( <i>E. coli</i> )                                                                                                                |
| 222479_s_at | DYNC1LI1          | dynein, cytoplasmic 1, light intermediate chain 1                                                                                                |
| 222622_at   | LOC283871         | hypothetical protein LOC283871                                                                                                                   |
| 222655_s_at | IMPAD1            | inositol monophosphatase domain containing 1                                                                                                     |
| 222660_s_at | RNF38             | ring finger protein 38                                                                                                                           |
| 222671_s_at | JMJD4             | jumonji domain containing 4                                                                                                                      |
| 222821_s_at | GEMIN7            | gem (nuclear organelle) associated protein 7                                                                                                     |
| 222912_at   | ARRB1             | arrestin, beta 1                                                                                                                                 |
| 222957_at   | NEU4              | sialidase 4                                                                                                                                      |

Schmuck et al. - Supplementary documents 12

|             |                |                                                                                                                                            |
|-------------|----------------|--------------------------------------------------------------------------------------------------------------------------------------------|
| 223054_at   | DNAJB11        | DnaJ (Hsp40) homolog, subfamily B, member 11                                                                                               |
| 223108_s_at | ZCCHC17        | zinc finger, CCHC domain containing 17                                                                                                     |
| 223142_s_at | UCK1           | uridine-cytidine kinase 1                                                                                                                  |
| 223267_at   | RG9MTD1        | RNA (guanine-9-) methyltransferase domain containing 1                                                                                     |
| 223368_s_at | C9orf32        | chromosome 9 open reading frame 32                                                                                                         |
| 223440_at   | C16orf70       | chromosome 16 open reading frame 70                                                                                                        |
| 223490_s_at | EXOSC3         | exosome component 3                                                                                                                        |
| 223558_at   | C9orf80        | chromosome 9 open reading frame 80                                                                                                         |
| 223635_s_at | SSBP3          | single stranded DNA binding protein 3                                                                                                      |
| 223763_at   | DTNBP1         | dystrobrevin binding protein 1                                                                                                             |
| 223798_at   | SLC41A2        | solute carrier family 41, member 2                                                                                                         |
| 223819_x_at | COMMD5         | COMM domain containing 5                                                                                                                   |
| 224468_s_at | C19orf48       | chromosome 19 open reading frame 48                                                                                                        |
| 224770_s_at | NAV1           | neuron navigator 1                                                                                                                         |
| 224824_at   | FAM36A         | family with sequence similarity 36, member A                                                                                               |
| 225139_at   | ---            | ---                                                                                                                                        |
| 225209_s_at | UBE2J2         | ubiquitin-conjugating enzyme E2, J2 (UBC6 homolog, yeast)                                                                                  |
| 225241_at   | CCDC80         | coiled-coil domain containing 80                                                                                                           |
| 225404_at   | C1orf212       | chromosome 1 open reading frame 212                                                                                                        |
| 225455_at   | TADA1L         | transcriptional adaptor 1 (HFI1 homolog, yeast)-like                                                                                       |
| 225595_at   | CREBZF         | CREB/ATF bZIP transcription factor                                                                                                         |
| 225599_s_at | LOC286144      | hypothetical LOC286144                                                                                                                     |
| 225682_s_at | POLR3H         | polymerase (RNA) III (DNA directed) polypeptide H (22.9kD)<br>GLI-Kruppel family member GLI4 /// zinc finger protein 41 homolog<br>(mouse) |
| 227023_at   | GLI4 /// ZFP41 |                                                                                                                                            |
| 227186_s_at | MRPL41         | mitochondrial ribosomal protein L41                                                                                                        |
| 227437_at   | ---            | ---                                                                                                                                        |
| 227455_at   | C6orf136       | chromosome 6 open reading frame 136                                                                                                        |
| 227599_at   | C3orf59        | chromosome 3 open reading frame 59                                                                                                         |
| 227905_s_at | AZI2           | 5-azacytidine induced 2                                                                                                                    |
| 228231_at   | ---            | ---                                                                                                                                        |
| 229061_s_at | SLC25A13       | solute carrier family 25, member 13 (citrin)                                                                                               |
| 229790_at   | TERF2          | telomeric repeat binding factor 2                                                                                                          |
|             | CBWD1 ///      |                                                                                                                                            |
|             | CBWD2 ///      |                                                                                                                                            |
|             | CBWD5 ///      | COBW domain containing 1 /// COBW domain containing 2 /// COBW                                                                             |
|             | CBWD3 ///      | domain containing 5 /// COBW domain containing 3 /// COBW domain                                                                           |
| 229804_x_at | CBWD6          | containing 6                                                                                                                               |
| 230009_at   | FAM118B        | family with sequence similarity 118, member B                                                                                              |
| 230027_s_at | MRPL43         | mitochondrial ribosomal protein L43                                                                                                        |
| 230462_at   | NUMB           | numb homolog (Drosophila)                                                                                                                  |
| 230522_s_at | C9orf100       | chromosome 9 open reading frame 100                                                                                                        |
| 230623_x_at | USP28          | ubiquitin specific peptidase 28                                                                                                            |
| 230852_at   | STAC3          | SH3 and cysteine rich domain 3                                                                                                             |
| 231121_at   | HPS3           | Hermansky-Pudlak syndrome 3                                                                                                                |
| 231200_at   | LSM14B         | LSM14B, SCD6 homolog B (S. cerevisiae)                                                                                                     |
| 231396_s_at | FAM126A        | family with sequence similarity 126, member A                                                                                              |
| 231901_at   | C19orf52       | chromosome 19 open reading frame 52                                                                                                        |
| 232196_at   | LCA5L          | Leber congenital amaurosis 5-like                                                                                                          |
| 232510_s_at | BBS1 /// DPP3  | Bardet-Biedl syndrome 1 /// dipeptidyl-peptidase 3                                                                                         |
| 232538_at   | ---            | ---                                                                                                                                        |
| 233252_s_at | STRBP          | spermatid perinuclear RNA binding protein                                                                                                  |
| 233469_at   | psiTPTE22      | TPTE pseudogene                                                                                                                            |
| 234723_x_at | ---            | ---                                                                                                                                        |
| 234885_at   | ---            | ---                                                                                                                                        |
| 234944_s_at | FAM54A         | family with sequence similarity 54, member A                                                                                               |

Schmuck et al. - Supplementary documents 13

|             |             |                                                                         |
|-------------|-------------|-------------------------------------------------------------------------|
| 235021_at   | KIAA2026    | KIAA2026                                                                |
| 235022_at   | C18orf19    | chromosome 18 open reading frame 19                                     |
| 235096_at   | LEO1        | Leo1, Paf1/RNA polymerase II complex component, homolog (S. cerevisiae) |
| 235114_x_at | HOOK3       | hook homolog 3 (Drosophila)                                             |
| 235280_at   | ---         | ---                                                                     |
| 235356_at   | NHLRC2      | NHL repeat containing 2                                                 |
| 235431_s_at | PELI3       | pellino homolog 3 (Drosophila)                                          |
| 235554_x_at | C4orf28     | chromosome 4 open reading frame 28                                      |
| 235851_s_at | GNAS        | GNAS complex locus                                                      |
| 235961_at   | GPR161      | G protein-coupled receptor 161                                          |
| 236259_at   | STK4        | serine/threonine kinase 4                                               |
| 236938_at   | ---         | ---                                                                     |
| 237741_at   | SLC25A36    | Solute carrier family 25, member 36                                     |
| 237847_at   | NTN1        | Netrin 1                                                                |
| 238980_x_at | C17orf56    | chromosome 17 open reading frame 56                                     |
| 239251_at   | ---         | ---                                                                     |
| 239413_at   | CEP152      | centrosomal protein 152kDa                                              |
| 239812_s_at | IQCH        | IQ motif containing H                                                   |
| 240515_at   | ---         | ---                                                                     |
| 240933_at   | ---         | ---                                                                     |
| 241173_at   | ---         | ---                                                                     |
| 241411_at   | ---         | ---                                                                     |
| 242005_at   | ---         | ---                                                                     |
|             | ATP6 ///    |                                                                         |
| 242131_at   | LOC440552   | ATP synthase 6; ATPase subunit 6 ///                                    |
| 242850_at   | ---         | ---                                                                     |
| 243777_at   | RAB7L1      | RAB7, member RAS oncogene family-like 1                                 |
| 244046_at   | URG4        | up-regulated gene 4                                                     |
| 244296_at   | hCG_1776047 | HCG1776047                                                              |
| 244818_at   | LOC390933   | Hypothetical LOC390933                                                  |
| 34187_at    | RBMS2       | RNA binding motif, single stranded interacting protein 2                |
| 38290_at    | RGS14       | regulator of G-protein signaling 14                                     |
| 38707_r_at  | E2F4        | E2F transcription factor 4, p107/p130-binding                           |
| 39249_at    | AQP3        | aquaporin 3 (Gill blood group)                                          |
| 76897_s_at  | FKBP15      | FK506 binding protein 15, 133kDa                                        |
| 91684_g_at  | EXOSC4      | exosome component 4                                                     |
